1 ***Toxoplasma* type II effector GRA15 has limited influence *in vivo***

2 **Emily F. Merritt<sup>1,2</sup>, Joshua A. Kochanowsky<sup>1,2,#</sup>, Perrine Hervé<sup>3</sup>,**  
3 **Alison A. Watson<sup>1</sup>, Anita A. Koshy<sup>1,2,4,\*</sup>**

4 **Running title: GRA15 has a minimal effect *in vivo***

5

6 **1** Department of Immunobiology, University of Arizona, Tucson, Arizona, United States of  
7 America, University of Arizona, Tucson, Arizona, United States of America

8

9 **2** BIO5 Institute, University of Arizona, Tucson, Arizona, United States of America

10 **3** Microbiologie Fondamentale et Pathogénicité, CNRS UMR 5234, Université de Bordeaux,  
11 Bordeaux, France.

12 **4** Department of Neurology, University of Arizona, Tucson, Arizona, United States of America

13

14 \* Address correspondence to Anita Koshy, [akoshy@arizona.edu](mailto:akoshy@arizona.edu)

15 # current address: Department of Microbiology, Immunology & Molecular Genetics, University  
16 of California Los Angeles, Los Angeles, California, United States of America

## 17 **Abstract**

18

19 *Toxoplasma gondii* is an intracellular parasite that establishes a long-term infection in the brain  
20 of many warm-blooded hosts, including humans and rodents. Like all obligate intracellular  
21 microbes, *Toxoplasma* uses many effector proteins to manipulate the host cell to ensure parasite  
22 survival. While some of these effector proteins are universal to all *Toxoplasma* strains, some are  
23 polymorphic between *Toxoplasma* strains. One such polymorphic effector is GRA15. The *gra15*  
24 allele carried by type II strains activates host NF- $\kappa$ B signaling, leading to the release of cytokines  
25 such as IL-12, TNF, and IL-1 $\beta$  from immune cells infected with type II parasites. Prior work  
26 also suggested that GRA15 promotes early host control of parasites *in vivo*, but the effect of  
27 GRA15 on parasite persistence in the brain and the peripheral immune response has not been  
28 well defined. For this reason, we sought to address this gap by generating a new II $\Delta$ *gra15* strain  
29 and comparing outcomes at 3 weeks post infection between WT and II $\Delta$ *gra15* infected mice. We  
30 found that the brain parasite burden and the number of macrophages/microglia and T cells in the  
31 brain did not differ between WT and II $\Delta$ *gra15* infected mice. In addition, while II $\Delta$ *gra15*  
32 infected mice had a lower number and frequency of splenic M1-like macrophages and frequency  
33 of PD-1<sup>+</sup> CTLA-4<sup>+</sup> CD4<sup>+</sup> T cells and NK cells compared to WT infected mice, the IFN- $\gamma$ <sup>+</sup> CD4  
34 and CD8 T cell populations were equivalent. In summary, our results suggest that *in vivo* GRA15  
35 may have a subtle effect on the peripheral immune response, but this effect is not strong enough  
36 to alter brain parasite burden or parenchymal immune cell number at 3 weeks post infection.

37

## 38 **Introduction**

39  
40 To successfully establish a persistent infection, a microbe must take a "Goldilocks" route. The  
41 microbe must evade host defenses enough to avoid microbial elimination while also preventing  
42 host death from an overwhelming microbial burden or immune response. Thus, successful  
43 persistent microbes evolve mechanisms for provoking "the right" amount of a host response  
44 (1,2). *Toxoplasma gondii* is an eukaryotic intracellular parasite that persistently infects many  
45 warm blooded animals—from birds to humans—including approximately 10-15% of the United  
46 States population (3). *Toxoplasma* has achieved such success, in part, by manipulating host cell  
47 signaling pathways through a variety of secreted effector proteins. These secreted effector  
48 proteins are often known as ROPs and GRAs and are delivered by specialized secretory  
49 organelles. Different ROPs and GRAs directly block immune clearance, alter the host cell cycle,  
50 drive cytoskeletal remodeling, and alter apoptotic pathways (4–11). While many of these effector  
51 proteins are the same in all *Toxoplasma* strains, some are polymorphic and show *Toxoplasma*  
52 strain-specific effects (12,13). One such polymorphic effector protein is GRA15 (14).

53 During *in vitro* infection with type II *Toxoplasma* strains—but not with type I or type III  
54 strains—GRA15 activates the NF- $\kappa$ B pathway, which leads to IL-12, IL-1 $\beta$ , and TNF release by  
55 macrophages (15–18). GRA15 also limits parasite growth in IFN- $\gamma$  stimulated human and murine  
56 fibroblasts *in vitro* by recruiting host defense proteins to the parasite's intracellular niche (15).  
57 Consistent with GRA15 stimulating pro-inflammatory host responses that limit parasite  
58 expansion, during acute infection, mice inoculated with type II parasites that lack GRA15 have  
59 lower local IFN- $\gamma$  levels and higher parasite burdens compared to mice infected with wild-type  
60 type II parasites (14).

61           While such findings might be expected to result in a higher systemic and brain parasite  
62 burden during later stages of infection, the data are mixed. One paper found that *IIΔgra15*  
63 parasites showed no difference in cyst counts at 21 days post infection (dpi) compared to  
64 parental parasites, while another paper found that *IIΔgra15* parasites showed a trend toward a  
65 decrease in cyst count compared to WT parasites (19,20). Given these discrepant studies, we  
66 sought to re-address the role of GRA15 in outcomes of type II infection, including assessing the  
67 systemic and brain immune response as well as the brain parasite burden.

68

## 69 **Methods**

70

### 71 **Ethics Statement**

72 All procedures and experiments were carried out in accordance with the Public Health Service  
73 Policy on Human Care and Use of Laboratory Animals and approved by the University of  
74 Arizona's Institutional Animal Care and Use Committee (#12-391). All mice were bred and  
75 housed in specific-pathogen-free University of Arizona Animal Care facilities.

76

### 77 **Parasite maintenance and generation of *IIΔgra15* and**

#### 78 ***IIΔgra15::GRA15***

79

80 All parasite strains were maintained through serial passage in human foreskin fibroblasts (HFFs)  
81 in DMEM supplemented with 10% FBS, 100 I.U./ml penicillin/streptomycin, and 2 mM  
82 glutagro. All parasite strains were generated from a type II strain Pruginaud (*PruΔhpt*) in which

83 the endogenous hypoxanthine xanthine guanine phosphoribosyl transferase gene is deleted. The  
84 wild type (WT) strain used throughout the paper expresses a Cre fusion protein that is injected  
85 into host cells prior to parasite invasion (21). The  $\text{II}\Delta\text{gra15}$  used throughout this work also  
86 expresses the Cre fusion protein.

87

88 To disrupt GRA15 in  $\text{II}\Delta\text{hpt}$  parasites, GRA15 targeting CRISPR plasmids (sgGRA15Up and  
89 sgGRA15down) were generated from a sgUPRT plasmid (plasmid #54464) using a Q5  
90 mutagenesis protocol (22). To generate a plasmid to insert *hpt* and *toxofilin:cre* into the GRA15  
91 locus, upstream (500-bp) and downstream (500-bp) adjacent to the sgGRA15Up and  
92 sgGRA15Down target sequences were used to flank *hpt* and *toxofilin:cre*. We then transfected  
93 the  $\text{II}\Delta\text{hpt}$  parasites with the 1) sgGRA15Up CRISPR, 2) sgGRA15Down CRISPR, and 3)pTKO  
94 plasmid (23) with GRA15 homology regions flanking *hpt* and *toxofilin:cre*. These parasites  
95 underwent selection using media containing 25 mg/ml mycophenolic acid and 50 mg/ml of  
96 xanthine prior to dilution to individual clones (24). Single clones were then screened for  
97 disruption of the *gra15* locus and confirmed to have lost NF- $\kappa$ B activation by  
98 immunofluorescence. Clones were also confirmed to express *toxofilin:cre* by causing Cre-  
99 mediated recombination as previously described (25).

100

101 A complemented  $\text{II}\Delta\text{gra15}::\text{GRA15}$  strain was made by inserting the GRA15 coding sequence  
102 with 1000 bp upstream of the GRA15 TSS into a plasmid containing the selectable marker  
103 bleomycin (26). The plasmid was linearized and transfected into  $\text{II}\Delta\text{gra15}$  parasites. These  
104 parasites were placed under selection in complete DMEM supplemented with 5  $\mu\text{g/ml}$  zeocin  
105 until lysing out. Lysed out parasites were incubated in 50  $\mu\text{g/ml}$  zeocin media for 4 hours before

106 being transferred to HFFs containing the 5 µg/ml zeocin media. This process was repeated three  
107 times prior to cloning by limiting dilution. Single clones were then screened for expression of  
108 *gra15* by Q-PCR and the ability to activate NF-κB pathway by immunofluorescence.

109

## 110 **Mice**

111 Unless specifically noted, mice used in this study are Cre-reporter mice in a C57Bl/6J  
112 background. Cells in these mice express GFP when cells undergo Cre-mediated recombination  
113 (27). These mice were purchased from Jackson labs and bred in the University of Arizona  
114 Animal Center (stock # 007906). BALB/cJ mice (Strain #:000651) were used for one  
115 experiment. Male and female mice were intraperitoneally inoculated with 10,000 syringed lysed  
116 parasites resuspended in 200 µl of UPS grade PBS. Unless otherwise stated, two cohorts were  
117 used for each experiment. For 3 week post infection (wpi) studies, cohort one included 4-5 mice  
118 per infection, aged 12-16 weeks, with initial weights between 18 and 33 grams. Cohort two  
119 included 9-12 mice per infection, aged 6-10 weeks, with initial weights between 16 and 32  
120 grams. For acute time points of 2- and 5-days post infection, each cohort contained 4-5 mice per  
121 infection. Mice were given food and water ad libitum and provided moist chow to alleviate  
122 suffering.

123

## 124 **Tissue preparation for histology and DNA extraction**

125 At the appropriate time points, mice were euthanized with CO<sub>2</sub>, without use of anesthesia, and  
126 transcardially perfused with 20 ml cold PBS. Brains were removed and divided into two  
127 hemispheres. The left hemisphere was drop fixed by placement in 4% paraformaldehyde (PFA).

128 The next day, PFA was removed and replaced with 30% sucrose. After sucrose embedding,  
129 brains were sagittally sectioned to 40  $\mu$ m sections using a microtome (Microm HM 430) and  
130 stored in cryoprotectant media at -20° C until staining. The anterior ¼ of the right half of the  
131 brain was sectioned coronally, placed in an Eppendorf tube, and flash frozen until used for DNA  
132 extraction.

133

### 134 **NF- $\kappa$ B activation assay**

135 Syringe lysed parasites were added to confluent HFF monolayers grown on glass coverslips at an  
136 MOI of 7.5 and spun down at 300 rpm for 1 minute. 24 hours post infection, cells were washed  
137 and fixed for 15 minutes with 4% PFA followed by 5 min in ice cold methanol. Cells were then  
138 blocked in 3% goat serum for 1 hour at room temperature and incubated in mouse anti-Sag1 (28)  
139 [DG52] (gift from John Boothroyd, 1:5000) and anti-NF- $\kappa$ B (p65) (Santa Cruz Biotechnology,  
140 sc-372 , 1:1000) antibodies overnight at 4°C. The next day, cells were washed to remove excess  
141 antibody and incubated in goat anti-mouse secondary antibody AF568 (Thermo Fischer  
142 Scientific, A-11004, 1:500) and goat anti-rabbit AF488 (Life technologies, A-11008, 1:500) for  
143 one hour. Coverslips were then washed 3 times in PBS, with the first wash containing Hoechst  
144 (1:5000) to stain for host cell and parasite nuclei. Images were then obtained on an ECHO  
145 Revolve fluorescent microscope to analyze nuclear NF- $\kappa$ B localization.

146 To measure NF- $\kappa$ B activation at early time points, syringe lysed parasites were filtered and  
147 washed in 40 ml of cDMEM prior to addition to confluent HFF monolayers grown on glass  
148 coverslips at an MOI of 5. Cells were fixed in 4% PFA at 1, 3, or 24 hrs post infection, blocked  
149 in 3% goat serum for 1 hour at room temperature and incubated in mouse anti-Sag1(28) [DG52]

150 and anti-NF- $\kappa$ B (Cell Signaling Technology, 8242S, 1:1000 antibodies) overnight at 4°C. The  
151 subsequent steps followed the protocol described above.

152

### 153 **Growth assay**

154 Syringe lysed parasites were added to confluent HFF monolayers grown on glass coverslips at an  
155 MOI of 1 and spun down at 300 rpm for 1 minute. 24 hours post infection, cells were washed in  
156 PBS and fixed for 20 minutes in 4% PFA. Cells were then permeabilized, blocked, and stained  
157 using an anti-*Toxoplasma* antibody (Thermo Fischer, PA17252, 1:5000, goat anti-rabbit 568  
158 Thermo Fischer, A11011, 1:500). To enumerate the number of parasites per vacuole, coverslips  
159 were analyzed using an ECHO Revolve fluorescent microscope.

160

### 161 **Plaque assay**

162 Confluent monolayers of HFF cells were infected with 250 parasites of the indicated strains in  
163 cDMEM. After 10 days, media was removed, cultures were washed with PBS, and the  
164 monolayers were fixed in ice cold methanol for 10 minutes. Fixed monolayers were then stained  
165 with crystal violet for 10 minutes at room temperature.

166

### 167 **Immunohistochemistry**

168 For identification of macrophages/microglia, free floating brain sections were washed, treated in  
169 H<sub>2</sub>O<sub>2</sub> for 40 minutes, washed again, blocked with goat serum, and incubated with polyclonal  
170 rabbit anti-Iba-1 antibody overnight (Wako Pure Chemical Industries, 019-19741 Ltd. (1:3000)).  
171 The next day, samples were washed, incubated for 1 hour in biotinylated goat anti-rabbit



172 antibody (Vector Laboratories, BA-1000 (1:500)). After washing off residual secondary  
173 antibody, samples were incubated in ABC solution (Thermo Fisher, 32020) for 1 hour followed  
174 by 60 second treatment with 3,3'-Diaminobenzidine (DAB)(Vector Laboratories, SK-4100).  
175 Samples were then washed, mounted, and cover slipped prior to immune cell quantification.

176

## 177 **Immunofluorescence**

178 For identification of T cells, free floating brain sections were washed in TBS, blocked with 3%  
179 goat serum diluted in TBS for 1 hour, and then incubated overnight with hamster anti-CD3 $\epsilon$   
180 antibody diluted in 1% goat serum/0.3% Triton-X100/TBS (BD Biosciences, 550277). The next  
181 day samples were washed in TBS and incubated at room temperature in goat anti-hamster 647  
182 (Life Technologies, A-21451). After a 4-hour incubation in secondary antibody, samples were  
183 washed for 5 minutes in TBS/Hoechst (1:5000) followed by 2 subsequent washes in TBS. Brain  
184 sections were then mounted, cover slipped with Fluoromount-G<sup>TM</sup> (Southern Biotech, 0100-01),  
185 and z-stacks were obtained on an ECHO Revolve microscope using a 10x objective.

186

## 187 **Iba-1+ cell quantification**

188 To quantify Iba-1+ cells in brain sections, stained sections were imaged using light microscopy.  
189 Eight images were obtained in a stereotyped pattern within the cortex of the brain section using a  
190 20x objective. Three matched sections were imaged per mouse (24 images/mouse). Cells were  
191 quantified manually using FIJI software. Individuals quantifying cells were blinded to infection  
192 status of mice.

193

## 194 **T cell quantification**

195 Imaris software was used to quantify number of T cells within each 40  $\mu$ m confocal image. The  
196 spots tool was used to generate a threshold of detectable T cells and quantified by the program.  
197 Individuals quantifying cells were blinded to infection status of mice.

198

## 199 **Quantitative PCR**

200 To quantify parasite burden, genomic DNA was isolated from the anterior quarter of the right  
201 hemisphere (brain), the left lobe of the liver, or the distal quarter of the spleen using DNeasy  
202 Blood and Tissue kit (Qiagen, 69504), following the manufacturer's protocol. The *Toxoplasma*  
203 B1 gene was amplified using SYBR Green on the Eppendorf Mastercycler et realplex 2.2  
204 system. Gapdh was used to normalize parasite DNA levels.

205

## 206 **Cyst Stain**

207 Sagittal brain sections were blocked in 3% goat serum diluted in 0.3% TritonX-100/TBS for 1  
208 hour. These sections were then incubated with biotinylated Dolichos Biflorus Agglutinin (DBA)  
209 (Vector laboratories 1031, 1:500) and a polyclonal rabbit anti-*Toxoplasma* antibody (Thermo  
210 Fisher Scientific, PA17252, 1:5000) overnight at 4° C. Samples were then washed and incubated  
211 with Streptavidin Cy5 (Life technologies, S21374, 1:500) and goat anti-rabbit 568 secondary  
212 (Thermo Fisher Scientific, A11011, 1:500) for 4 hours at room temperature, after which samples  
213 were washed to remove residual antibody. Hoechst (Thermo Fisher Scientific, H3570, 1:5000)  
214 was added to the first TBS wash for 5 minutes to stain for nuclei. Sections were then washed two  
215 more times, mounted on slides, and cover slipped using Fluoromount-G™. The number of cysts  
216 (DBA+, anti-*Toxoplasma* antibody+) was enumerated using an Echo Revolve fluorescent  
217 microscope.

218

## 219 **Single cell suspension for Flow Cytometry**

220 At appropriate time points, mice were euthanized by CO<sub>2</sub> and intracardially perfused with 20 ml  
221 cold PBS. Spleens were then harvested for flow cytometry, maintained in complete RPMI (86%  
222 RPMI, 10% FBS, 1% penicillin/streptomycin, 1% L-glutamine, 1% NEAA, 1% sodium  
223 pyruvate, and <0.01% β-mercaptoethanol) and processed to generate single cell suspensions. For  
224 single cell suspension, spleens were passed through a 40 μm strainer and centrifuged at 1200  
225 rpm, 4°C, for 5 minutes. After removal of supernatant, red blood cells were lysed by addition of  
226 1 ml ammonium chloride-potassium carbonate (ACK) lysis buffer (Life Technologies,  
227 A1049201). ACK was neutralized by the addition of cRPMI, centrifuged at 1200 rpm, 4°C, for 5  
228 minutes. The supernatant was removed and the pellet resuspended in cRPMI. The number of  
229 viable cells was quantified by diluting 10 μl of the single cell suspension in 90 μl trypan blue and  
230 counting on a hemocytometer. T cell panels to be quantified for IFN-γ were treated with PMA,  
231 Ionomycin, and Brefeldin for 4 hours in 37°C incubator prior to washing, blocking, and staining.

232

## 233 **Staining for Flow Cytometry**

234 One million live cells of each sample were plated into a 96 well plate, washed in FACS buffer  
235 (1% FBS/PBS), and blocked with Fc block (Biolegend, 101302) to prevent nonspecific staining.  
236 Samples were then stained for a T cell panel or a macrophage panel. Samples were incubated in  
237 antibody (1:100) diluted in FACS buffer for at least 30 minutes, protected from light, then  
238 stained with live/dead Fixable yellow Dead Cell stain (Life Technologies, L34959). Samples  
239 were then washed and fixed using intracellular staining permeabilization and fixation kit  
240 (eBioscience, 00-5223-00). To stain for Foxp3, T-bet, Gata-3, and IFN-γ, the manufacturer's

241 intracellular staining protocol was used (eBioscience, 00-5223-56; 00-5123-43; 00-8333-56).

242 Samples were then washed, run on a LSRII (University of Arizona Cancer Center Flow

243 Cytometry Core), and data analyzed using FlowJo™ Software.

244

## 245 **Peritoneal Exudate Cells Isolation**

246 Cre reporter mice were inoculated intraperitoneally with saline or 10,000 WT or  $\Pi\Delta$ *gra15*

247 parasites. At 2 and 5 dpi, peritoneal exudate cells were collected by injecting 5 ml of cold PBS

248 into the exposed peritoneal cavity, massaging the cavity, and recollecting PBS/cellular suspension.

249 PECS were then incubated in Fc block, stained for CD45, and run on the LSRII.

250

## 251 **Parasite RNA isolation**

252 Confluent human foreskin fibroblasts were infected with indicated strains for 48 hours.

253 Monolayers were scraped, syringe lysed, and resuspended in TRIzol™; RNA was extracted per

254 manufacturer's instructions (Thermo Fisher Scientific, 15596026). One  $\mu$ g of isolated RNA was

255 converted to cDNA using High-Capacity cDNA Reverse Transcriptase kit (Thermo Fisher

256 Scientific, 4368814). Q-PCR was performed on cDNA using GRA15 and TgActin specific

257 primers.

## 258 **Statistics**

259 Graphs were generated and statistical tests were run using Prism software version 9.4.1. All *in*

260 *vivo* experiments in C57BL/6 mice were repeated with two independent cohorts; unless otherwise

261 noted the data were analyzed with a two-way analysis of variance (ANOVA) with uncorrected

262 Fisher's LSD. Infection of BALB/c mice was done once; data were analyzed with a T-test. For

263 intracellular growth assays and plaque assays, experiments were repeated three times and statistical  
264 analysis was conducted on the composite data. For intracellular growth assay, a two-way ANOVA  
265 with uncorrected Fisher's LSD was used, for plaque assays a one-way ANOVA was used.  
266 Analysis of parasite genomes in the liver at 5 dpi showed one mouse from one cohort to be an  
267 outlier as determined by the ROUT outlier test. Therefore, that mouse was removed for statistical  
268 analysis.

269

## 270 **Results**

271

### 272 **GRA15 does not influence parasite burden or macrophage/microglia** 273 **and T cell abundance in the brain at 3 wpi**

274

275 To probe the influence of GRA15 during early chronic infection, we generated a type II strain  
276 (Prugniaud or Pru) that lacked *gra15* ( $\text{II}\Delta\text{gra15}$ ) and the appropriate complemented strain  
277 ( $\text{II}\Delta\text{gra15}::\text{GRA15}$ ) using previously described CRISPR-Cas9 methodology (29). As the  $\text{II}\Delta\text{gra15}$   
278 and  $\text{II}\Delta\text{gra15}::\text{GRA15}$  strains express a *rho*ptry::Cre recombinase fusion protein, for the wild-type  
279 (WT)/control strain, we used a Pru strain that has been engineered to express the same *rho*ptry::Cre  
280 fusion protein (21). The  $\text{II}\Delta\text{gra15}$  was confirmed to lack NF- $\kappa$ B activation and the complemented  
281 strain restored NF- $\kappa$ B activity at 24 hours post infection (hpi) (**S1 Fig A, B**). At 1 and 3 hpi, none  
282 of the strains induced NF- $\kappa$ B nuclear localization, regardless of GRA15 expression (**S1 Fig C**). To  
283 assess GRA15's effect *in vivo*, Cre reporter mice that express GFP only after Cre-mediated  
284 recombination (27) were inoculated with saline or WT,  $\text{II}\Delta\text{gra15}$ , or  $\text{II}\Delta\text{gra15}::\text{GRA15}$  parasites.

285 At 3 weeks post infection (wpi), spleen and brain were harvested. To assess overall brain parasite  
286 burden, we performed Q-PCR for a *Toxoplasma* specific gene (B1) on genomic DNA isolated  
287 from the brain (23,30). We found no statistical difference between WT and  $\Pi\Delta gra15$  infected brain  
288 though the  $\Pi\Delta gra15::GRA15$  infected brain consistently showed a lower parasite burden (**Fig 1A**).  
289 As a second mechanism for assessing brain parasite burden, we quantified the number of cysts by  
290 staining brain sections with Dolichos biflorous agglutinin (DBA), a lectin that stains sugar moieties  
291 on components of the cyst wall (**Fig 1B**) (31). Consistent with the Q-PCR data, cyst counts from  
292 WT and  $\Pi\Delta gra15$  infected brain were not statistically different while cysts counts from  
293  $\Pi\Delta gra15::GRA15$  infected brain were lower (**Fig 1C**). Given that the  $\Pi\Delta gra15::GRA15$  strain  
294 consistently appeared to be less capable of establishing an *in vivo* infection in multiple cohorts of  
295 mice, we performed *in vitro* studies to determine if this strain had a growth defect and/or had an  
296 unusual expression of *gra15*. Indeed, the  $\Pi\Delta gra15::GRA15$  strain showed a replication defect at  
297 24 hours post infection (**S1 Fig D**), though this difference did not translate into a defect in plaque  
298 formation (**S1 Fig E-G**). In addition, we determined that the complemented strain expressed  
299 approximately 5 fold more *gra15* compared to the WT strain (**S1 Fig H**). Given the lytic cycle  
300 defect—which we expect would be exacerbated *in vivo*—and the increased expression of *gra15* in  
301 the  $\Pi\Delta gra15::GRA15$  strain, we decided to move forward without the complement, as these  
302 phenotypes introduce variables for which we cannot control.

303 As GRA15 influences macrophage phenotypes *in vitro* and a change in macrophage  
304 skewing might affect the neuroinflammatory response without altering brain parasite burden, we  
305 next sought to evaluate the brain immune response. We focused on macrophages/microglia and T  
306 cells because these are the primary immune cells to infiltrate and/or be activated in the brain  
307 upon *Toxoplasma* infection (29). To quantify the number of macrophages/microglia, we stained

308 tissue sections with anti-Iba1 antibodies, which stains a cytoskeletal protein (Iba1) expressed by  
309 both macrophages and microglia. We then quantified the number of Iba1+ cells manually (29)  
310 finding no difference in the number of Iba1+ cells in brain sections from WT and  $\Delta$ gra15  
311 infected mice (**Fig 1D,E**). To quantify T cells, we performed immunofluorescent assays for T  
312 cells using an anti-CD3 $\epsilon$  antibody. We then imaged the stained tissue sections and analyzed the  
313 images with Imaris software, which is capable of segregating and counting the stained T cells in  
314 an automated manner (**Fig 1F,G**). We found no difference in the number of CD3 $\epsilon$ + cells in brain  
315 sections from WT and  $\Delta$ gra15 infected mice. Collectively, these data suggest that GRA15 does  
316 not affect *Toxoplasma*'s dissemination to or persistence in the brain at 3 wpi. GRA15 also does  
317 not appear to alter the number of macrophage/microglia or T cells present in the brain at 3 wpi.

318

### 319 **GRA15 may influence M1-like polarization of macrophages at 3 wpi**

320

321 While IHC allows us to quantify infiltrating immune cells, it cannot assess the polarization state  
322 of immune cells, which can be done by flow cytometry. Given that GRA15 induces an M1-like  
323 phenotype in infected macrophages *in vitro* (32), we were interested in determining how this  
324 gene influences macrophage phenotypes *in vivo*. As prior data from our lab has shown that the  
325 immune response within the spleen mirrors the immune response found in the brain at 3 wpi  
326 (29), we used splenocytes for our analyses. To that end, we used the following markers to  
327 segregate macrophages into pro-inflammatory macrophages (M1-like): CD45+, F4/80+ CD11b<sup>hi</sup>  
328 CD11c<sup>lo/int</sup>/ CD80+ CD86+ and wound-healing macrophages (M2): CD45+, F4/80+ CD11b<sup>hi</sup>  
329 CD11c<sup>lo/int</sup>/ CD206+/F4/80+ (gating scheme shown in **S2 Fig**). Given that we did not use iNOS  
330 staining which is required to identify a true M1 macrophage, we refer to our CD80+ CD86+

331 population as M1-like macrophages. Consistent with the *in vitro* data, our analyses showed that,  
332 compared to WT infected mice,  $\Pi\Delta gra15$  infected mice have fewer M1 macrophages (**Fig**  
333 **2A,B**). We did not detect differences in M2 macrophages (**Fig 2C,D**).

334

### 335 **GRA15 does not affect IFN- $\gamma$ producing T cell populations at 3 wpi**

336

337 M1/M1-like macrophages are expected to produce IL-12 (18,29,32). As IL-12 is one of many  
338 signals that polarizes naïve CD4<sup>+</sup> T cells to be T-bet<sup>+</sup>, IFN- $\gamma$  producing Th1 cells, we  
339 hypothesized that the lower number of M1-like macrophages provoked by  $\Pi\Delta gra15$  parasites  
340 might result in decreases in IFN- $\gamma$  production by T cells (33,34). To test this possibility, we  
341 profiled the splenic T cell compartment, assessing CD4 and CD8 numbers as well as their  
342 capabilities to produce IFN- $\gamma$  (gating scheme is shown in **S3 Fig**). We found no differences  
343 between the groups in terms of the number or frequency of Th1, Th2, or Treg T cells (**Fig 3A-F**).  
344 The number of IFN- $\gamma$  producing CD4 and CD8 T cells was also not different (**Fig 4**).

345 Collectively, these data suggest that, at 3 wpi, GRA15 does not influence IFN- $\gamma$  production in  
346 CD4 or CD8 T cells, despite potentially influencing M1-like macrophage number and frequency.

347

### 348 **GRA15 may influence the frequency of peripheral “exhausted” T** 349 **cells and NK cells at 3 weeks post infection in C57BL/6 mice**

350

351 As work from other labs have identified T cell exhaustion during chronic time points of  
352 *Toxoplasma* infection (35,36) and because such analysis has not been done with  $\Delta gra15$  strains,



353 we assessed the T cell compartment for exhausted T cells by looking for co-expression of  
354 inhibitory markers PD-1 and CTLA-4 (FMO shown in **S4 Fig**). We found that mice infected with  
355 *IIΔgra15* parasites generated a lower frequency of exhausted CD4<sup>+</sup> T cells, though the total  
356 number of exhausted CD4<sup>+</sup> T cells only trended down in *IIΔgra15* infected mice (**Fig 5A,B**). As  
357 NK cells have been shown to contribute to T cell exhaustion in the chronic phase of disease (37),  
358 we also quantified NK cell number and frequency, finding a lower frequency of NK in the  
359 *IIΔgra15* infected mice (**Fig 5C, D**). As with the exhausted T cells, the total number of NK cells  
360 only trended down in *IIΔgra15* infected mice (**Fig 5C, D**).

361

## 362 **GRA15 may influence parasite dissemination during acute infection.**

363

364 Given the published data suggesting a difference in parasite burden between WT and  
365 *IIΔgra15* parasites at 5 dpi (14), we were surprised that we did not see a difference in parasite  
366 burden in the brain at 3 wpi (**Fig 1A,C**). Therefore, we wondered if the previously reported  
367 GRA15-associated phenotypes could only be seen early in infection. To address this question,  
368 we inoculated Cre reporter mice intraperitoneally with saline or WT or *IIΔgra15* parasites and  
369 collected peritoneal exudate cells (PECS) and peritoneal fluid. Following the protocol from the  
370 previously published report (14), we measured IFN- $\gamma$  in the peritoneal fluid, finding no  
371 difference in IFN- $\gamma$  levels at 2 dpi (**Fig 6A**). While the prior study used bioluminescent imaging  
372 to quantify parasite burden, our parasites were not compatible with such measurements (i.e., our  
373 parasites do not express luciferase). Instead, as our parasite strains express a rhoptry::Cre fusion  
374 protein and in Cre reporter mice the number of GFP<sup>+</sup> cells correlates with the parasite burden  
375 (29), we used the number of green fluorescent protein-expressing (GFP<sup>+</sup>) PECs as an indirect

376 measure of peritoneal parasite burden. Unlike the prior work, at 2 and 5 dpi, we found no  
377 difference in the frequency of GFP<sup>+</sup> CD45<sup>+</sup> PECs between the two groups (**Fig 6B**). Though the  
378 GFP<sup>+</sup> PEC number were equivalent between WT and  $\Pi\Delta gra15$  infections at 2 and 5 dpi, Q-PCR  
379 for *Toxoplasma* B1 on genomic DNA isolated from liver and spleen at 5 dpi was lower in the  
380  $\Pi\Delta gra15$  infected mice (**Fig 6C, D**). In summary, unlike previously published data, we did not  
381 find a decrease in IFN- $\gamma$  within the peritoneal cavity at 2 dpi, nor did we find evidence of an  
382 increase in the number of  $\Pi\Delta gra15$  parasites compared to WT parasites at 2 or 5 dpi. On the  
383 contrary, if anything, our Q-PCR data suggest the opposite.

384         Given that our findings were inconsistent with the prior work, we speculated that these  
385 discrepancies arose from our using C57BL/6 mice while the prior work used BALB/c mice. We  
386 were particularly interested in this possibility because BALB/c mice and C57BL/6 mice are  
387 known to generate very different immune responses, with BALB/c mice being predisposed to a  
388 Th2 response and C57BL/6 being predisposed to a Th1 response (38–40). To determine if  
389 differences in mouse strain explained the discrepancy between our work and the prior work, we  
390 inoculated a cohort of BALB/c mice with WT or  $\Pi\Delta gra15$  parasites and measured IFN- $\gamma$  levels  
391 in the peritoneal cavity at 2 dpi. We found no difference in IFN- $\gamma$  levels between WT and  
392  $\Pi\Delta gra15$  infections in BALB/c mice (**Fig 6E**). However, consistent with BALB/c mice being  
393 predisposed to generating a Th2 response, the IFN- $\gamma$  levels in peritoneal fluid of BALB/c mice  
394 (**Fig 6E**) was approximately 10-fold lower than IFN- $\gamma$  levels in the peritoneal fluid of infected  
395 C57BL/6 mice (**Fig 6A**).

396

## 397 **Discussion**

398

399 As GRA15 acutely modulates the secretion of IL-12 by infected macrophages *in vitro*  
400 and has been reported to affect parasite growth and local IFN- $\gamma$  levels very early *in vivo*  
401 (15,18,41), here we sought to understand the biological relevance of these changes beyond the  
402 earliest days of infection by assessing brain outcomes at 3 wpi. We found that the brain parasite  
403 burden, the number of macrophages/microglia and T cells in the brain, and splenic CD4 and CD8  
404 IFN- $\gamma$ + T cells did not differ between WT and  $\Delta$ gra15 strains. We did find several subtle  
405 differences in splenocytes from WT and  $\Delta$ gra15 infected mice (decreased M1-like  
406 macrophages and frequency of PD-1+ CTLA-4+ CD4+ T cells and NK cells), but the biological  
407 significance of these findings is unclear given the other equivalent outcomes. In summary, the  
408 work presented here suggests that despite GRA15's well documented effects *in vitro*  
409 (14,15,18,32), for the outcomes we measured, GRA15 has little effect on cerebral toxoplasmosis  
410 and peripheral immune cell polarization in C57BL/6 mice at 3 wpi.

411 Our finding that GRA15 does not influence brain parasite burden, at least early in brain  
412 infection, is consistent with a prior publication that also used an independently generated  
413  $\Delta$ gra15 strain (19). Conversely, a different publication that used strains generated by the lab  
414 that originally identified the link between GRA15 and NF- $\kappa$ B found a trend ( $p>0.05$ ) toward a  
415 lower cyst burden at 4 wpi in mice infected with that  $\Delta$ gra15 strain (14,20). Collectively, these  
416 data suggest that GRA15 likely does not influence cyst burden early in brain infection, though  
417 variation can be seen with knockouts from different labs.

418 Though we did not find GRA15-related differences in the brain parasite burden or  
419 immune cells in the brain parenchyma, our identification of mice infected with  $\Delta$ gra15 as  
420 having a lower number and frequency of M1-like macrophages (**Fig 2A,B**) is consistent with the  
421 *in vitro* data suggesting GRA15 plays a role in polarizing macrophages to an M1-like phenotype

422 (14). However, the rest of the results indicate that this difference in the M1-like compartment is  
423 not sufficient to alter parasite abundance in the brain at 3 wpi. Our finding that  $\text{II}\Delta\text{gra15}$  infected  
424 mice have a lower frequency of “exhausted” CD4<sup>+</sup> T cells is novel and interesting, especially  
425 when viewed in the context that  $\text{II}\Delta\text{gra15}$  infected mice had the same number of IFN- $\gamma$   
426 producing CD4 and CD8 T cells as WT infected mice (i.e., no  $\text{II}\Delta\text{gra15}$  effect on these  
427 populations). While several possibilities might explain this discrepancy, one possibility is that  
428 these PD-1<sup>+</sup> CTLA-4<sup>+</sup> CD4 T cells are not exhausted. Recent work suggests the identification of  
429 exhausted cells using surface markers only is likely inadequate as PD-1<sup>hi</sup> cells that also express  
430 other inhibitory markers (e.g. TIM-3, CTLA-4) can be highly activated effector cells (i.e.,  
431 express IFN- $\gamma$ ) that have not yet fully differentiated (42). As our flow panel that included PD-1  
432 and CTLA-4 did not include IFN- $\gamma$ , we cannot determine if these cells were truly exhausted or  
433 maintain effector function. Future studies will be required to definitively determine the status of  
434 these cells.

435 The major limitation of this study, and every study that has examined type II *gra15*  
436 knockout strains in mice (14,18–20), is the lack of an appropriate complemented strain in which  
437 GRA15 has been ectopically expressed at the same level as in wild-type parasites. While a  
438 complemented strain is not necessary for negative results (i.e., no difference between the wild-  
439 type and KO strain), complemented strains are important for phenotypes that differ between  
440 wild-type and KO strains or between studies of independently generated KOs. For example, as  
441 noted above, we found differences between mice infected with the wild-type and  $\text{II}\Delta\text{gra15}$   
442 strains in the M1-like, “exhausted” CD4 T cell, and NK cell populations. Similarly, unlike prior  
443 work, we did not find a decrease in peritoneal supernatant IFN- $\gamma$  at 2 dpi in C57Bl/6 or BALB/c  
444 mice infected with  $\text{II}\Delta\text{gra15}$  parasites compared to mice infected with WT parasites (**Fig 6A, E**).

445 While several possibilities might explain these differences, appropriate complemented strains  
446 would help distinguish between GRA15 driven effects and effects driven by idiosyncratic  
447 differences of individual knockout strains.

448 Why does GRA15—which has clear and consistent phenotypes *in vitro* (e.g., NF- $\kappa$ B  
449 activation, IL-1 $\beta$  production)—have such a limited phenotype in mice? This discrepancy may  
450 relate to *Toxoplasma* having evolved to survive across a range of intermediate hosts, leading to  
451 redundancies in mechanisms to manipulate host signaling pathways. For example, *Toxoplasma*  
452 proteins GRA83, GRA24, profilin, GRA7, and GRA15 are all linked to IL-12 production from  
453 infected murine DCs and macrophages and are initiated through different ligand-receptor  
454 interactions (6,14,15,18,43–45). Therefore, these redundancies in how parasites trigger IL-12  
455 production in mice may compensate when parasites lack GRA15. On the other hand, species  
456 that lack the receptors that murine cells use to detect *Toxoplasma* protein (e.g., humans lack  
457 TLR11/12 which recognize the *Toxoplasma* protein profilin) may have a stronger dependency on  
458 GRA15 signaling to generate IL-12 during infection. Thus, while GRA15 may not play an  
459 essential role in mice up to 3 wpi, in a different host, GRA15 may be the difference between type  
460 II parasite survival and clearance.

461

## 462 **Acknowledgements**

463 We would like to thank the Koshy lab, both past and current members, for continuous  
464 discussion, fun, and support. We thank Melissa Lodoen for careful review of and commentary on  
465 the manuscript. We also thank the Department of Neuroscience at the University of Arizona for  
466 the use of the Imaris software. We thank UBRP student Sakthi Kumar for her help making the  
467 II $\Delta$ *gra15* parasite line. We thank John Boothroyd for the gift of mouse anti-Sag1 antibody. We

468 also thank the University of Arizona Cancer Center Flow Cytometry Core (supported by the  
469 National Cancer Institute of the National Institutes of Health under award number P30  
470 CA023074) and the UA Equipment Enhancement Fund for Improving Health (Echo Revolve) for  
471 enabling parts of this research.

472

### 473 **Funding Statement**

474 National Institute of Neurologic Disorders and Stroke

475 (NS095994 [AAK], NS095994-02S1 [JAK]), <https://www.ninds.nih.gov/>;and

476 the BIO5 Institute, University of Arizona (AAK), <http://bio5.org/>

477 The funders had no role in study design, data collection and analysis, decision to publish, or  
478 preparation of the manuscript.

479

### 480 REFERENCES

481

- 482 1. Sievers BL, Cheng MTK, Csiba K, Meng B, Gupta RK. SARS-CoV-2 and innate immunity:  
483 the good, the bad, and the “goldilocks.” *Cell Mol Immunol*. 2023 Nov 20;1–13.
- 484 2. Robinson RT, Huppler AR. The Goldilocks model of immune symbiosis with Mycobacteria  
485 and *Candida* colonizers. *Cytokine*. 2017 Sep;97:49–65.
- 486 3. Lykins J, Wang K, Wheeler K, Clouser F, Dixon A, El Bissati K, et al. Understanding  
487 Toxoplasmosis in the United States Through “Large Data” Analyses. *Clin Infect Dis*. 2016  
488 Aug 15;63(4):468–75.
- 489 4. Gay G, Braun L, Brenier-Pinchart MP, Vollaire J, Josserand V, Bertini RL, et al.  
490 *Toxoplasma gondii* TgIST co-opts host chromatin repressors dampening STAT1-dependent  
491 gene regulation and IFN- $\gamma$ -mediated host defenses. *J Exp Med*. 2016 Aug 22;213(9):1779–  
492 98.
- 493 5. Bando H, Sakaguchi N, Lee Y, Pradipta A, Ma JS, Tanaka S, et al. *Toxoplasma* Effector  
494 TgIST Targets Host IDO1 to Antagonize the IFN- $\gamma$ -Induced Anti-parasitic Response in  
495 Human Cells. *Front Immunol*. 2018;9:2073.
- 496 6. Braun L, Brenier-Pinchart MP, Yogavel M, Curt-Varesano A, Curt-Bertini RL, Hussain T, et  
497 al. A *Toxoplasma* dense granule protein, GRA24, modulates the early immune response to

- 498 infection by promoting a direct and sustained host p38 MAPK activation. *J Exp Med*. 2013  
499 Sep 23;210(10):2071–86.
- 500 7. Sangaré LO, Ólafsson EB, Wang Y, Yang N, Julien L, Camejo A, et al. In Vivo CRISPR  
501 Screen Identifies TgWIP as a *Toxoplasma* Modulator of Dendritic Cell Migration. *Cell Host*  
502 & *Microbe*. 2019 Oct 9;26(4):478-492.e8.
- 503 8. Delorme-Walker V, Abrivard M, Lagal V, Anderson K, Perazzi A, Gonzalez V, et al.  
504 Toxofilin upregulates the host cortical actin cytoskeleton dynamics, facilitating *Toxoplasma*  
505 invasion. *Journal of Cell Science*. 2012 Sep 15;125(18):4333–42.
- 506 9. Rastogi S, Xue Y, Quake SR, Boothroyd JC. Differential Impacts on Host Transcription by  
507 ROP and GRA Effectors from the Intracellular Parasite *Toxoplasma gondii*. *mBio* [Internet].  
508 2020 Jun 30 [cited 2020 Aug 4];11(3). Available from:  
509 <https://mbio.asm.org/content/11/3/e00182-20>
- 510 10. Du K, Lu F, Xie C, Ding H, Shen Y, Gao Y, et al. *Toxoplasma gondii* infection induces cell  
511 apoptosis via multiple pathways revealed by transcriptome analysis. *J Zhejiang Univ Sci B*.  
512 2022 Apr 1;23(4):315–27.
- 513 11. Besteiro S. *Toxoplasma* control of host apoptosis: the art of not biting too hard the hand that  
514 feeds you. *Microbial Cell*. 2015 May 30;2(6):178–81.
- 515 12. Boothroyd JC. Have It Your Way: How Polymorphic, Injected Kinases and Pseudokinases  
516 Enable *Toxoplasma* to Subvert Host Defenses. *PLOS Pathogens*. 2013 Apr  
517 25;9(4):e1003296.
- 518 13. Saeij JPJ, Boyle JP, Boothroyd JC. Differences among the three major strains of *Toxoplasma*  
519 *gondii* and their specific interactions with the infected host. *Trends Parasitol*. 2005  
520 Oct;21(10):476–81.
- 521 14. Rosowski EE, Lu D, Julien L, Rodda L, Gaiser RA, Jensen KDC, et al. Strain-specific  
522 activation of the NF- $\kappa$ B pathway by GRA15, a novel *Toxoplasma gondii* dense granule  
523 protein. *Journal of Experimental Medicine*. 2011 Jan 3;208(1):195–212.
- 524 15. Mukhopadhyay D, Sangaré LO, Braun L, Hakimi MA, Saeij JP. *Toxoplasma* GRA15 limits  
525 parasite growth in IFN $\gamma$ -activated fibroblasts through TRAF ubiquitin ligases. *The EMBO*  
526 *Journal*. 2020 May 18;39(10):e103758.
- 527 16. Jensen KDC, Hu K, Whitmarsh RJ, Hassan MA, Julien L, Lu D, et al. *Toxoplasma gondii*  
528 rhoptry 16 kinase promotes host resistance to oral infection and intestinal inflammation only  
529 in the context of the dense granule protein GRA15. *Infect Immun*. 2013 Jun;81(6):2156–67.
- 530 17. Jensen KDC, Wang Y, Wojno EDT, Shastri AJ, Hu K, Cornel L, et al. *Toxoplasma*  
531 polymorphic effectors determine macrophage polarization and intestinal inflammation. *Cell*  
532 *Host Microbe*. 2011 Jun 16;9(6):472–83.

- 533 18. Mukhopadhyay D, Arranz-Solís D, Saeij JPJ. Toxoplasma GRA15 and GRA24 are important  
534 activators of the host innate immune response in the absence of TLR11. PLOS Pathogens.  
535 2020 May 26;16(5):e1008586.
- 536 19. Fox BA, Guevara RB, Rommereim LM, Falla A, Bellini V, Pètre G, et al. Toxoplasma  
537 gondii Parasitophorous Vacuole Membrane-Associated Dense Granule Proteins Orchestrate  
538 Chronic Infection and GRA12 Underpins Resistance to Host Gamma Interferon. mBio. 2019  
539 Jul 2;10(4):e00589-19.
- 540 20. Glausen TG, Carrillo GL, Jin RM, Boyle JP, Saeij JPJ, Wohlfert EA, et al. The *Toxoplasma*  
541 Polymorphic Effector GRA15 Mediates Seizure Induction by Modulating Interleukin-1  
542 Signaling in the Brain. Weiss LM, editor. mBio. 2021 Jun 29;12(3):e01331-21.
- 543 21. Koshy AA, Dietrich HK, Christian DA, Melehani JH, Shastri AJ, Hunter CA, et al.  
544 Toxoplasma Co-opts Host Cells It Does Not Invade. PLOS Pathogens. 2012 Jul  
545 26;8(7):e1002825.
- 546 22. Shen B, Powell RH, Behnke MS. QTL Mapping and CRISPR/Cas9 Editing to Identify a  
547 Drug Resistance Gene in *Toxoplasma gondii*. J Vis Exp. 2017 22;(124).
- 548 23. Caffaro CE, Koshy AA, Liu L, Zeiner GM, Hirschberg CB, Boothroyd JC. A Nucleotide  
549 Sugar Transporter Involved in Glycosylation of the *Toxoplasma* Tissue Cyst Wall Is  
550 Required for Efficient Persistence of Bradyzoites. PLOS Pathogens. 2013 May  
551 2;9(5):e1003331.
- 552 24. Donald RGK, Carter D, Ullman B, Roos DS. Insertional Tagging, Cloning, and Expression  
553 of the *Toxoplasma gondii* Hypoxanthine-Xanthine-Guanine Phosphoribosyltransferase Gene:  
554 USE AS A SELECTABLE MARKER FOR STABLE TRANSFORMATION \*. Journal of  
555 Biological Chemistry. 1996 Jun 14;271(24):14010–9.
- 556 25. Koshy AA, Fouts AE, Lodoen MB, Alkan O, Blau HM, Boothroyd JC. *Toxoplasma*  
557 secreting Cre recombinase for analysis of host-parasite interactions. Nat Methods. 2010  
558 Apr;7(4):307–9.
- 559 26. Messina M, Niesman I, Mercier C, Sibley LD. Stable DNA transformation of *Toxoplasma*  
560 *gondii* using phleomycin selection. Gene. 1995 Nov 20;165(2):213–7.
- 561 27. Madisen L, Zwingman TA, Sunkin SM, Oh SW, Zariwala HA, Gu H, et al. A robust and  
562 high-throughput Cre reporting and characterization system for the whole mouse brain. Nat  
563 Neurosci. 2010 Jan;13(1):133–40.
- 564 28. Burg JL, Perelman D, Kasper LH, Ware PL, Boothroyd JC. Molecular analysis of the gene  
565 encoding the major surface antigen of *Toxoplasma gondii*. The Journal of Immunology. 1988  
566 Nov 15;141(10):3584–91.
- 567 29. Tuladhar S, Kochanowsky JA, Bhaskara A, Ghotmi Y, Chandrasekaran S, Koshy AA. The  
568 ROP16III-dependent early immune response determines the subacute CNS immune response  
569 and type III *Toxoplasma gondii* survival. PLOS Pathogens. 2019 Oct 24;15(10):e1007856.



- 570 30. Noor S, Habashy AS, Nance JP, Clark RT, Nemati K, Carson MJ, et al. CCR7-Dependent  
571 Immunity during Acute *Toxoplasma gondii* Infection. *Infect Immun*. 2010 May;78(5):2257–  
572 63.
- 573 31. Knoll LJ, Boothroyd JC. Isolation of developmentally regulated genes from *Toxoplasma*  
574 *gondii* by a gene trap with the positive and negative selectable marker hypoxanthine-  
575 xanthine-guanine phosphoribosyltransferase. *Mol Cell Biol*. 1998 Feb;18(2):807–14.
- 576 32. Jensen KDC, Wang Y, Wojno EDT, Shastri AJ, Hu K, Cornel L, et al. *Toxoplasma*  
577 Polymorphic Effectors Determine Macrophage Polarization and Intestinal Inflammation.  
578 *Cell Host Microbe*. 2011 Jun 16;9(6):472–83.
- 579 33. Tubo NJ, Pagán AJ, Taylor JJ, Nelson RW, Linehan JL, Ertelt JM, et al. Single naive CD4+  
580 T cells from a diverse repertoire produce different effector cell types during infection. *Cell*.  
581 2013 May 9;153(4):785–96.
- 582 34. Powell MD, Read KA, Sreekumar BK, Jones DM, Oestreich KJ. IL-12 signaling drives the  
583 differentiation and function of a TH1-derived TFH1-like cell population. *Sci Rep*. 2019 Sep  
584 30;9(1):13991.
- 585 35. Bhadra R, Gigley JP, Weiss LM, Khan IA. Control of *Toxoplasma* reactivation by rescue of  
586 dysfunctional CD8+ T-cell response via PD-1-PDL-1 blockade. *Proc Natl Acad Sci U S A*.  
587 2011 May 31;108(22):9196–201.
- 588 36. Bhadra R, Cobb DA, Khan IA. Donor CD8+ T Cells Prevent *Toxoplasma gondii* De-  
589 Encystation but Fail To Rescue the Exhausted Endogenous CD8+ T Cell Population. *Infect*  
590 *Immun*. 2013 Sep;81(9):3414–25.
- 591 37. Ivanova DL, Krempels R, Denton SL, Fettel KD, Saltz GM, Rach D, et al. NK Cells  
592 Negatively Regulate CD8 T Cells to Promote Immune Exhaustion and Chronic *Toxoplasma*  
593 *gondii* Infection. *Front Cell Infect Microbiol*. 2020;10:313.
- 594 38. Bergersen KV, Barnes A, Worth D, David C, Wilson EH. Targeted Transcriptomic Analysis  
595 of C57BL/6 and BALB/c Mice During Progressive Chronic *Toxoplasma gondii* Infection  
596 Reveals Changes in Host and Parasite Gene Expression Relating to Neuropathology and  
597 Resolution. *Front Cell Infect Microbiol*. 2021;11:645778.
- 598 39. Hsieh CS, Macatonia SE, O’Garra A, Murphy KM. T cell genetic background determines  
599 default T helper phenotype development in vitro. *Journal of Experimental Medicine*. 1995  
600 Feb 1;181(2):713–21.
- 601 40. Güler ML, Gorham JD, Hsieh CS, Mackey AJ, Steen RG, Dietrich WF, et al. Genetic  
602 Susceptibility to Leishmania: IL-12 Responsiveness in TH1 Cell Development. *Science*.  
603 1996 Feb 16;271(5251):984–7.
- 604 41. Gov L, Karimzadeh A, Ueno N, Lodoen MB. Human innate immunity to *Toxoplasma gondii*  
605 is mediated by host caspase-1 and ASC and parasite GRA15. *mBio*. 2013 Jul 9;4(4):e00255-  
606 13.

- 607 42. Haymaker C, Wu R, Bernatchez C, Radvanyi L. PD-1 and BTLA and CD8+ T-cell  
608 “exhaustion” in cancer. *Oncoimmunology*. 2012 Aug 1;1(5):735–8.
- 609 43. Mercer HL, Snyder LM, Doherty CM, Fox BA, Bzik DJ, Denkers EY. *Toxoplasma gondii*  
610 dense granule protein GRA24 drives MyD88-independent p38 MAPK activation, IL-12  
611 production and induction of protective immunity. *PLoS Pathog*. 2020 May;16(5):e1008572.
- 612 44. Thind AC, Mota CM, Gonçalves APN, Sha J, Wohlschlegel JA, Mineo TWP, et al. The  
613 *Toxoplasma gondii* effector GRA83 modulates the host’s innate immune response to  
614 regulate parasite infection. *mSphere*. 2023 Sep 28;0(0):e00263-23.
- 615 45. Yang CS, Yuk JM, Lee YH, Jo EK. *Toxoplasma gondii* GRA7-Induced TRAF6 Activation  
616 Contributes to Host Protective Immunity. *Infect Immun*. 2015 Dec 28;84(1):339–50.
- 617  
618

619 **Figure 1. GRA15 does not influence brain parasite burden in the brain at 3 weeks post**  
620 **infection.** Mice were intraperitoneally (i.p.) inoculated with saline (control) or 10,000 WT,  
621  $\Pi\Delta gra15$ , or  $\Pi\Delta gra15:GRA15$  parasites. Brains and spleens were harvested at 3 weeks post  
622 infection (wpi). Mice from these infections were used in Figures 1-5. **A.** Graph of *Toxoplasma*  
623 brain burden as assessed by Q-PCR for the *Toxoplasma*-specific B1 gene. **B.** Representative  
624 images of a brain tissue cyst stained with Dolichos biflorus agglutinin (DBA). *Top image* is DBA  
625 staining, *middle image* is staining with anti-*Toxoplasma* antibodies, and *bottom image* is merge.  
626 **C.** Quantification of cyst numbers in 8 brain sections per mouse. **D.** Representative images of  
627 Iba1+ cells (microglia/macrophages). Scale bar, 100  $\mu$ m **E.** Quantification of the number of Iba-  
628 1+ cells. **F.** Representative images of CD3 $\epsilon$ + cells (T cells). Scale bar, 100  $\mu$ m. Panels on right  
629 are enlarged insert of white box in left panels. **G.** Quantification of CD3 $\epsilon$ + cells. **A, C, E, G.**  
630 Bars, mean  $\pm$  SEM. N = 8 fields of view/section, 3 sections/mouse, 5-12 mice/group. For each  
631 mouse, the number of cells/section was averaged to create a single point. Data representative of  
632 two independent experiments.

633  
634 **Figure 2. GRA15 may affect splenic M1-like macrophage population at 3 wpi.** **A, B.** Splenic  
635 mononuclear cells were evaluated for the presence of M1-like macrophages (CD45+, F4/80+,  
636 CD11b<sup>hi</sup>, CD11b<sup>lo/int</sup>, CD80+, CD86+) **C, D.** Splenic mononuclear cells were evaluated for the  
637 presence of M2 macrophages (CD45+, F4/80+, CD11b<sup>hi</sup>, CD11c<sup>lo/int</sup>, CD206+ (MMR). Bars,  
638 mean  $\pm$  SEM. N=11-12 mice/infected group. Data are representative of two independent  
639 experiments.

640  
641 **Figure 3. GRA15 does not influence splenic Th2, Tregs, or Th1 CD4+ T cells populations at**  
642 **3 wpi.** **A,B.** Splenic CD4+ CD3+ T cells were evaluated for the presence Th2 T cells (CD3+

643 CD4+ Gata-3+) **C,D**. Splenic CD4+ CD3+ T cells were evaluated for the presence regulatory T  
644 cells (CD3+ CD4+ Foxp3+) **E,F**. Splenic CD4+ CD3+ T cells were evaluated for the presence of  
645 Th1 T cells (CD3+ CD4+ T-bet+) Bars, mean  $\pm$  SEM. N=11-12 mice/infected group. Unlisted p  
646 values were not significant. Data are representative of two independent experiments.

647  
648 **Figure 4. GRA15 does not influence IFN- $\gamma$  producing T cell populations at 3 wpi. A.**

649 Splenic CD4+ CD3+ T cells were evaluated for their ability to make IFN- $\gamma$  **B**. Splenic CD8+  
650 CD3+ T cells were evaluated for their ability to make IFN- $\gamma$ . Bars, mean  $\pm$  SEM. N=11-12  
651 mice/infected group. Data are representative of two independent experiments. Unlisted p values  
652 were  $\geq$  0.05.

653  
654 **Figure 5. GRA15 may influence the frequency of peripheral “exhausted” T cells and NK**

655 **cells at 3 weeks post infection. A,B**. Splenocytes were evaluated for the presence of CTLA-  
656 4+/PD-1+ CD4+ T cells **C,D**. Splenocytes were evaluated for the presence of CD3- NK1.1+  
657 cells. Bars, mean  $\pm$  SEM. N=11-12 mice/infection strain. Data are representative of two  
658 independent experiments.

659  
660 **Figure 6. GRA15 may increase parasite dissemination during acute infection. A-D. Cre**

661 reporter mice were inoculated with 10,000 WT or  $\Pi\Delta gra15$  parasites. At denoted time points peritoneal  
662 lavage was done to isolate peritoneal exudate cells (PECs). At 5 dpi liver and spleen tissue was also  
663 collected for B1 analysis. **A**. ELISA of IFN- $\gamma$  found in the peritoneal cavity at 2 dpi. **B**. Frequency of  
664 GFP+ CD45+ cells found within the peritoneal cavity at 2 and 5 dpi. **C**. Q-PCR of parasite genomes on  
665 DNA isolated from liver at 5 dpi. **D**. Q-PCR of parasite genomes on DNA isolated from spleen at 5 dpi.  
666 **E**. BALB/c mice were intraperitoneally inoculated with 5,000 WT or  $\Pi\Delta gra15$  parasites. Graph shows  
667 levels of IFN- $\gamma$  detected by ELISA using peritoneal lavage fluid at 2 dpi. Bars, mean  $\pm$  SEM. N = 4-5

668 mice/infection strain. **B-D**. Each dot represents a mouse. **A-D**. Data are representative of two  
669 independent experiments, 4-5 mice/infection strain/cohort. Statistics: Two-way ANOVA, Fisher's LSD  
670 multiple comparisons test. **E**. Statistics: T-test. N=5 mice per group, one experiment.  
671

672 **Figure 1**  
673

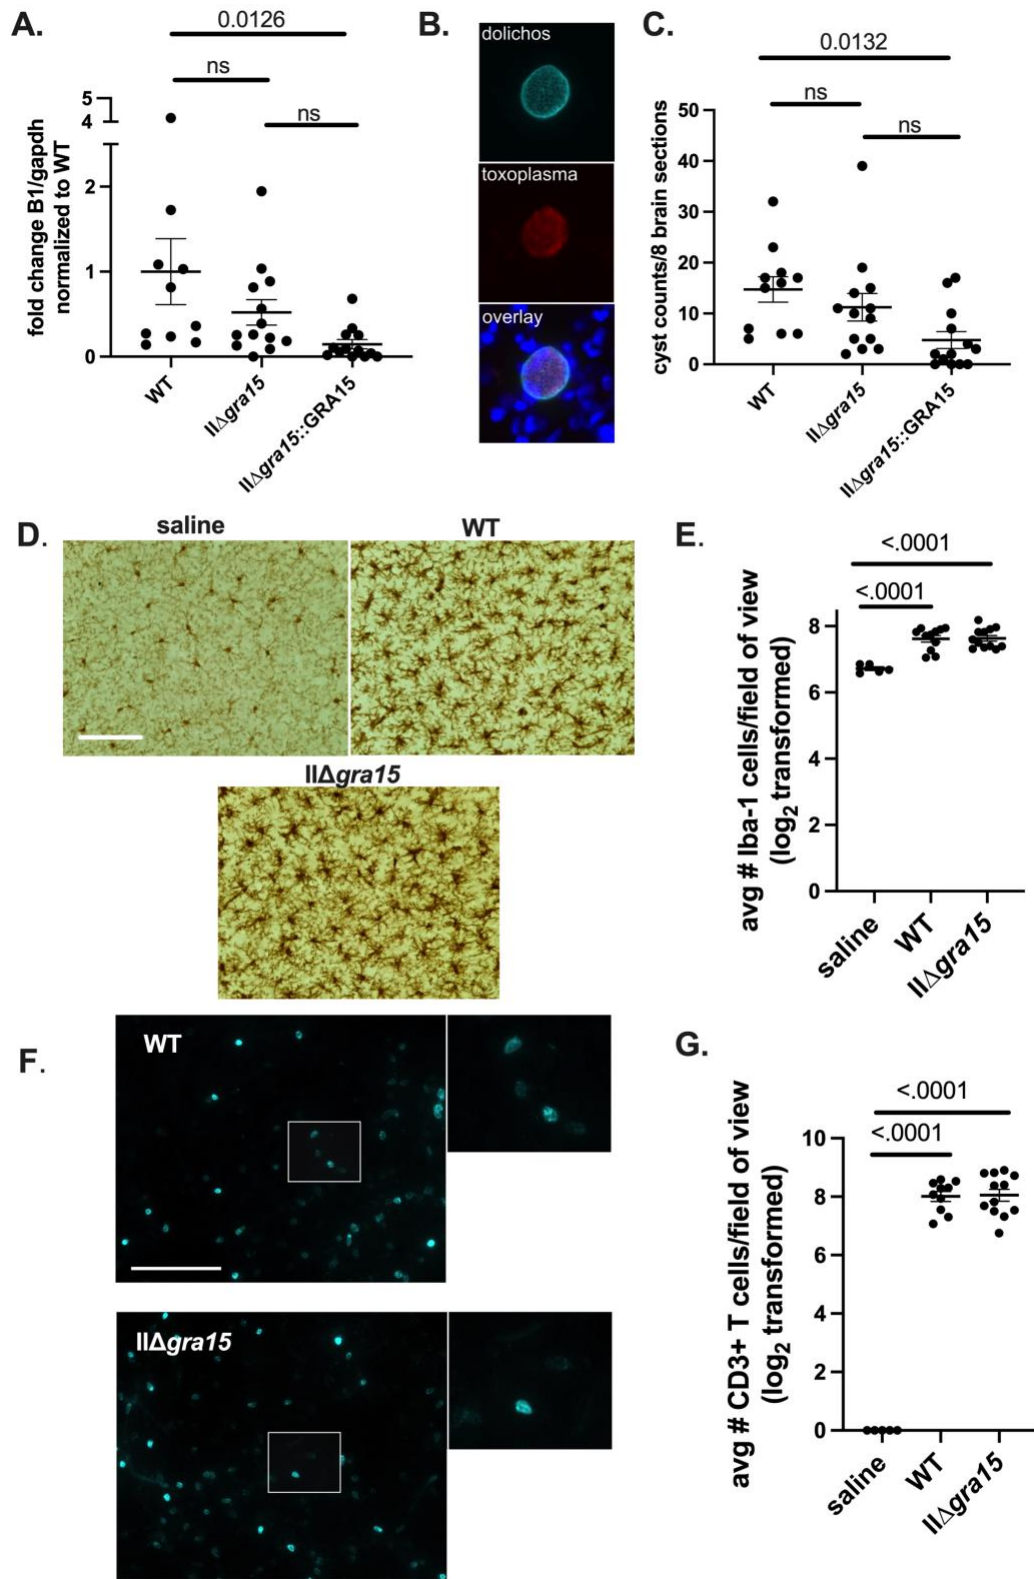

674

675 **Figure 2**

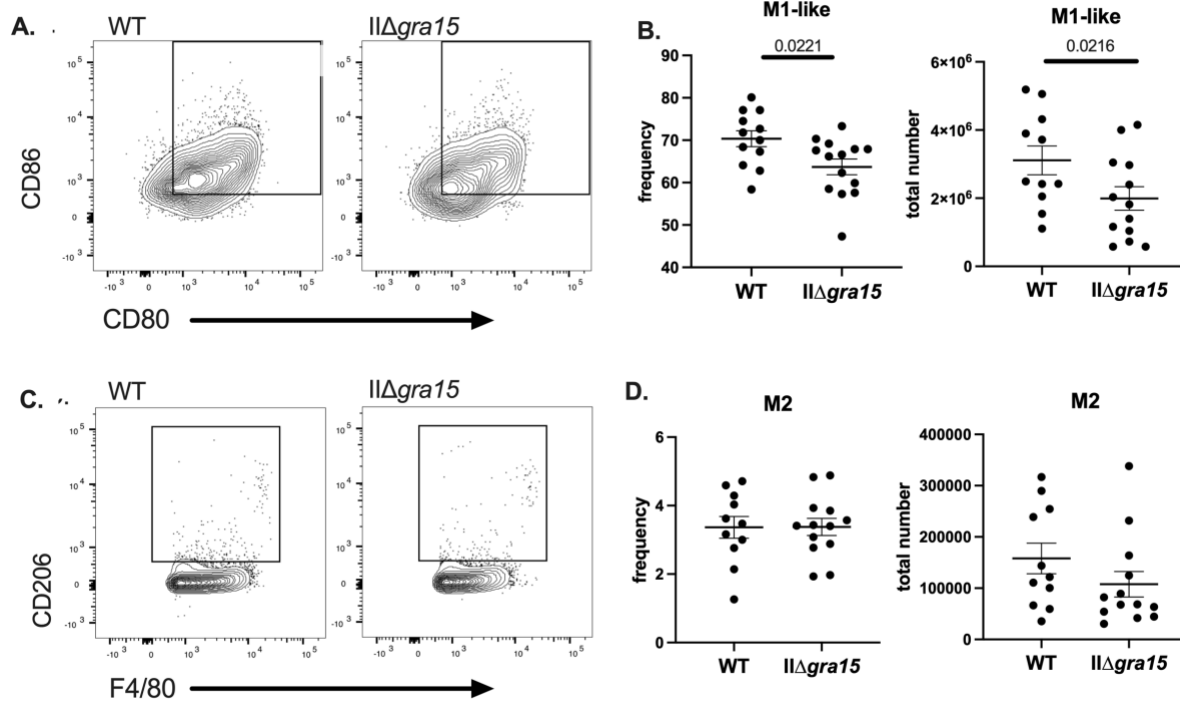

676  
677

678 **Figure 3**

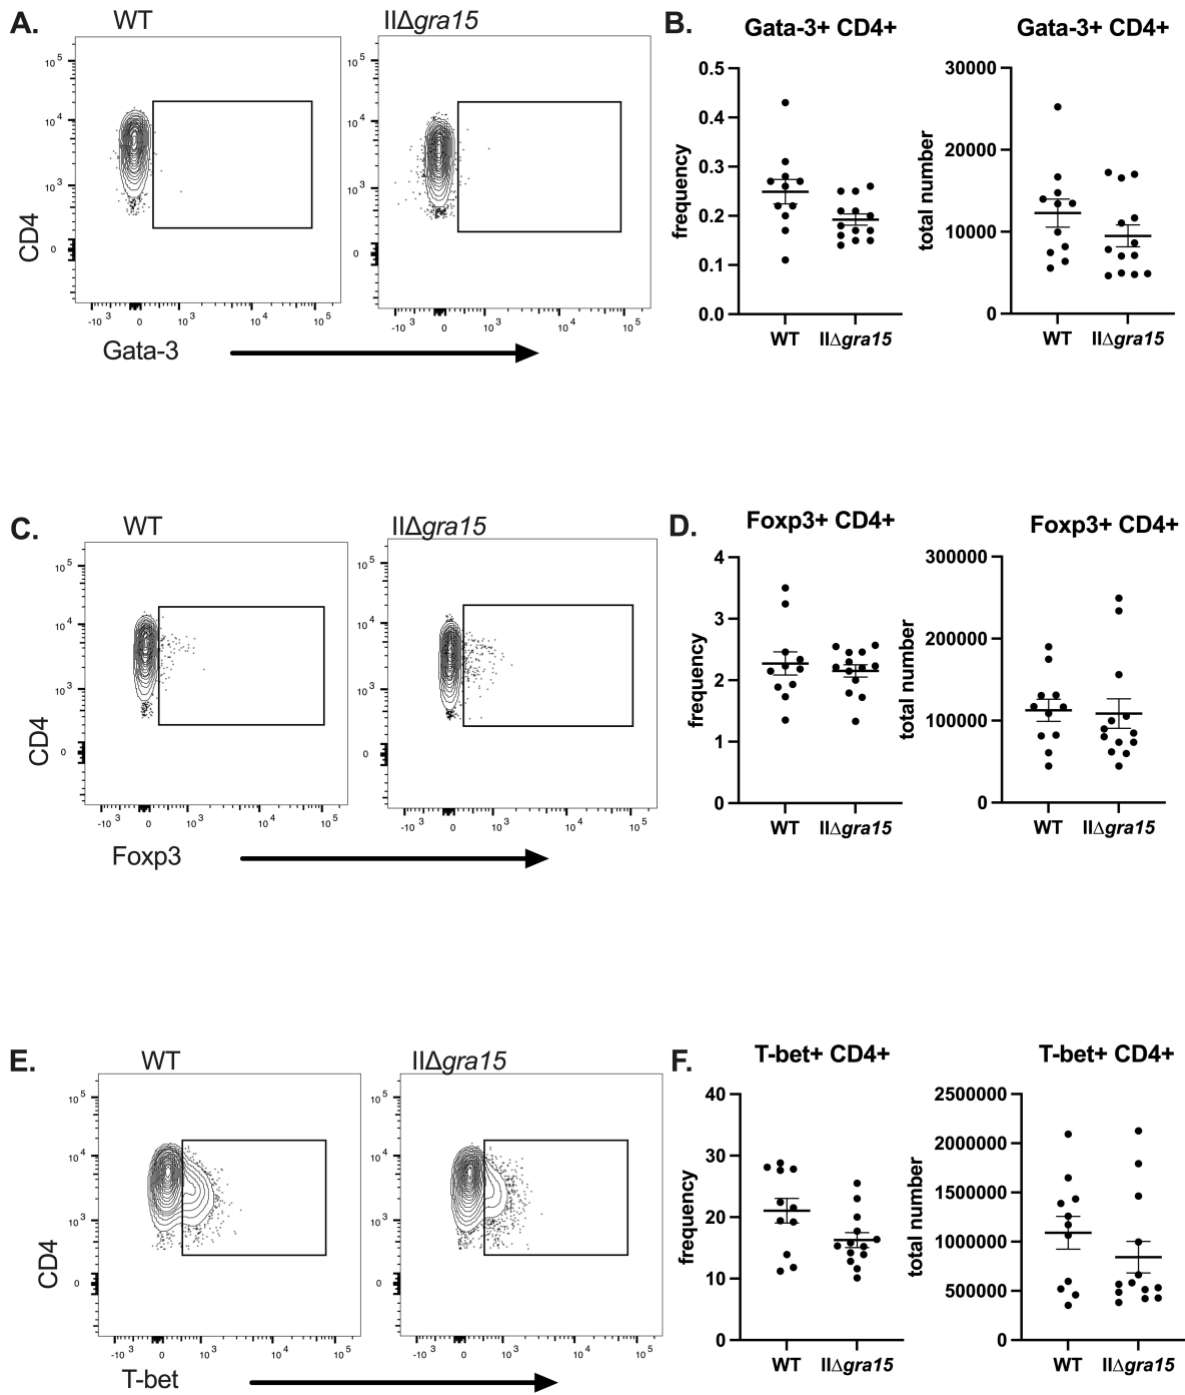

679  
680



681 **Figure 4**

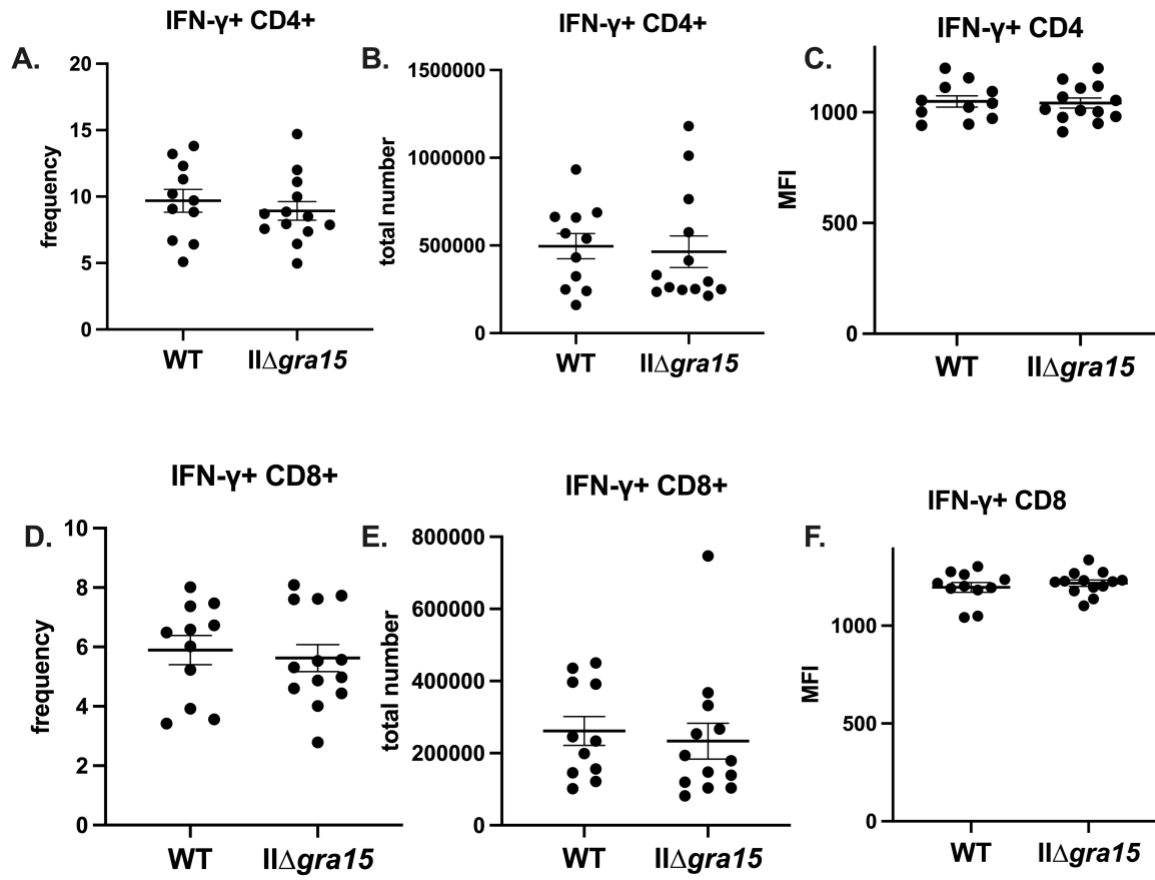

682  
683

684 **Figure 5**

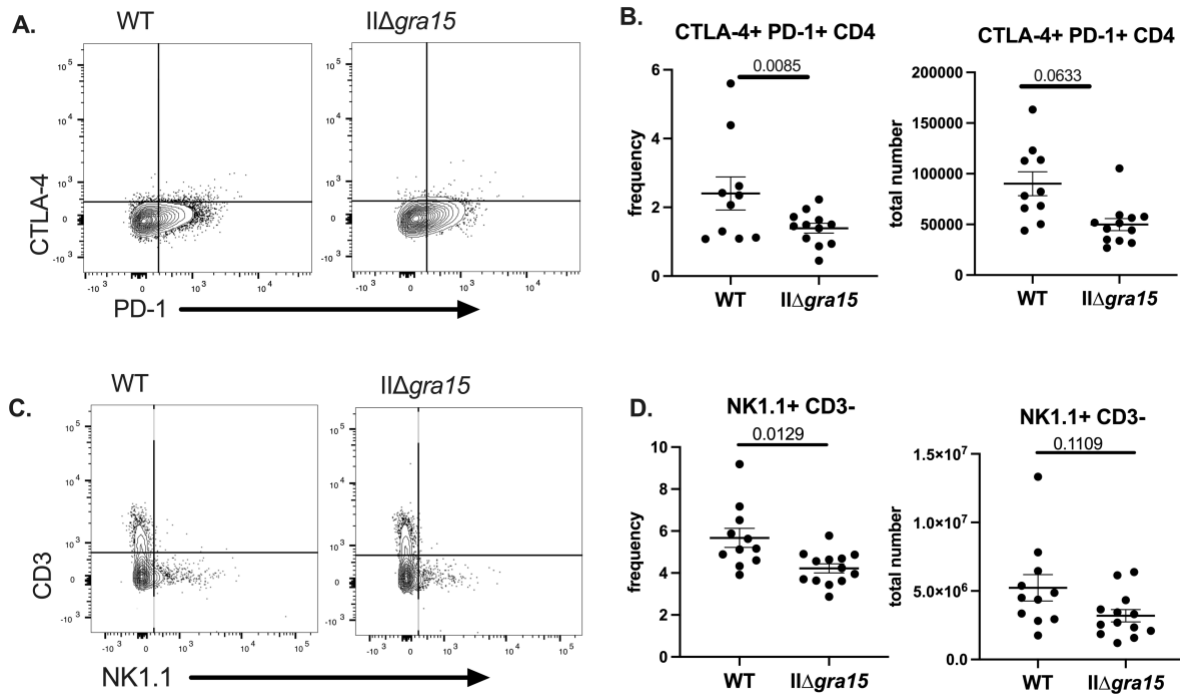

685  
686

687 **Figure 6**

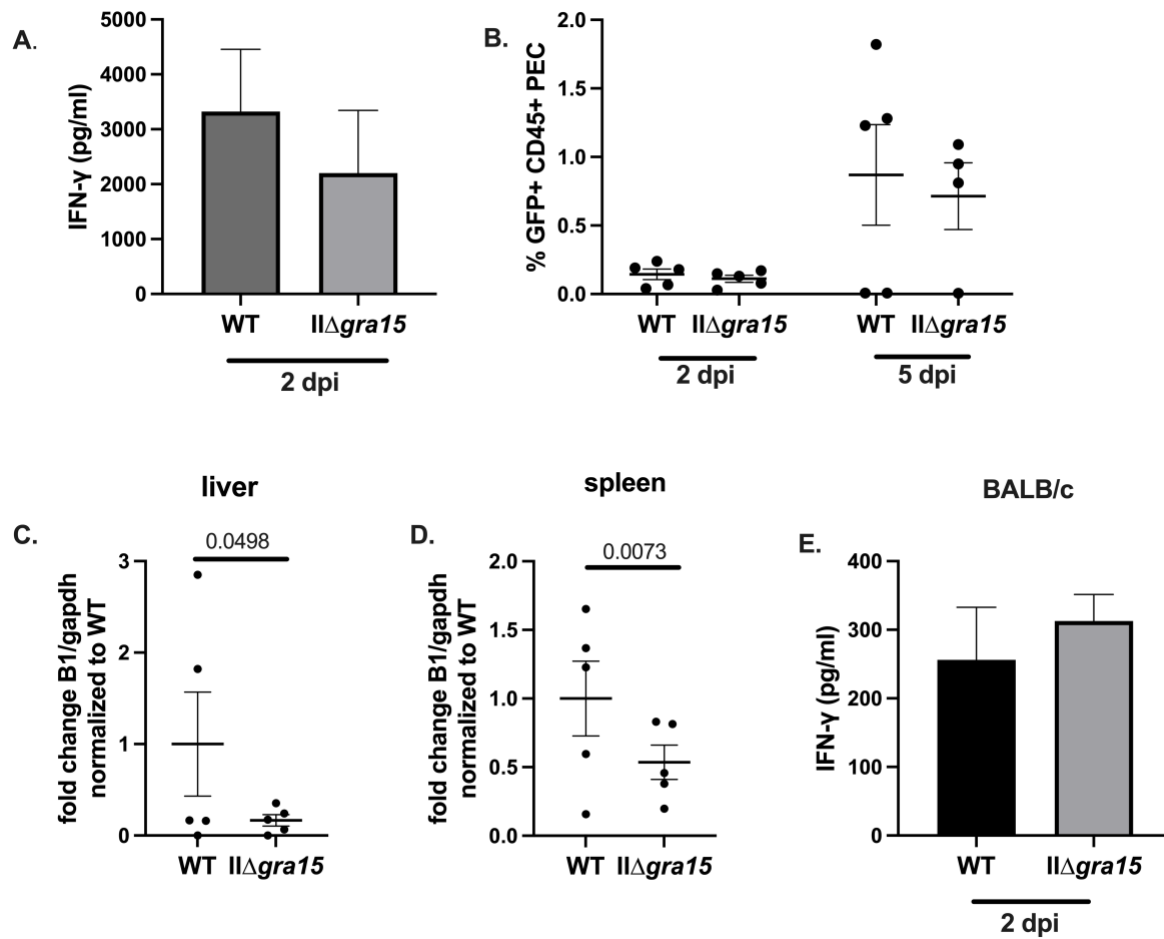

688
